# Supplementary material for: Interface kinetic diffusion reaction leading to fast and continuous generation of AgCl nanocubes in NaCl solution
Source: Royal Society of Chemistry journal article supplement (doi:10.1039/c3dt51660a), 2013-01-01
Supplement: c3dt51660a.pdf [file c3dt51660a.pdf]

## Supporting information

### Interface Kinetic Diffusion Reaction Leading to Fast and Continuous Generation of AgCl Nanocubes in NaCl Solution

Zaizhu Lou,<sup>a</sup> Baibiao Huang,<sup>\*a</sup> Zeyan Wang,<sup>a</sup> Xiaoyan Qin,<sup>a</sup> Xiaoyang Zhang,<sup>a</sup>  
Yuanyuan Liu,<sup>a</sup> Rui Zhang,<sup>a</sup> Ying Dai,<sup>b</sup> and Myung-Hwan Whangbo<sup>c</sup>

<sup>a</sup>State Key Laboratory of Crystal Materials, Shandong University, Jinan 250100, P. R. China

<sup>b</sup>School of Physics, Shandong University, Jinan 250100, P. R. China

<sup>c</sup>Department of Chemistry, North Carolina State University, Raleigh, North Carolina, 27695-8204, USA

Contact author: Baibiao Huang, E-mail: [bbhuang@sdu.edu.cn](mailto:bbhuang@sdu.edu.cn).

**Table S1** The morphologies and size of AgCl samples prepared under different conditions

| Samples | Potential | Concentration of NaCl (mM) | Concentration of Na <sub>2</sub> SO <sub>4</sub> (M) | Size of samples (nm) | Morphology            | Stirring         |
|---------|-----------|----------------------------|------------------------------------------------------|----------------------|-----------------------|------------------|
| A       | 3         | 1                          | 0.1                                                  | 400                  | Cubes                 | Without          |
| B       | 3         | 2                          | 0.1                                                  | 600                  | Cubes                 | Without          |
| C       | 3         | 4                          | 0.1                                                  | 800                  | Cubes                 | Without          |
| D       | 3         | 8                          | 0.1                                                  | 1000                 | Cubes(with bad edges) | Without          |
| A'      | 1.5       | 3                          | 0.1                                                  | 1200                 | Cubes                 | Without          |
| B'      | 3         | 3                          | 0.1                                                  | 500                  | Cubes                 | Without          |
| C'      | 4         | 3                          | 0.1                                                  | 500                  | Cubes                 | Without          |
| D'      | 6         | 3                          | 0.1                                                  | 500                  | Cubes                 | Without          |
| a       | 3         | 3                          | 0                                                    | ////                 | Thick AgCl layer      | Without          |
| b       | 3         | 3                          | 0.16                                                 | 300                  | Cubes                 | Without          |
| c       | 3         | 3                          | 0.32                                                 | 200                  | Cubes                 | Without          |
| a'      | 3         | 3                          | 0.1                                                  | 200-1000             | Irregular particles   | With             |
| b'      | 3         | 3                          | 0.1                                                  | 400                  | Concave cubes         | Without (bottom) |

The production of AgCl nanocubes can be calculated using the equation E1:

$$\text{E1} \quad m_{\text{AgCl}} = \frac{I \cdot t}{e \cdot N} M_{\text{AgCl}} \quad (1)$$

where  $m_{\text{AgCl}}$  is the weight (g) of the produced AgCl nanocubes per h,  $I$  the current (A),  $t$  the time (s), and  $e$  the electrical charge ( $1.6 \times 10^{-19}$ ),  $N$  the Avogadro number, and  $M_{\text{AgCl}}$  the molar mass of AgCl.

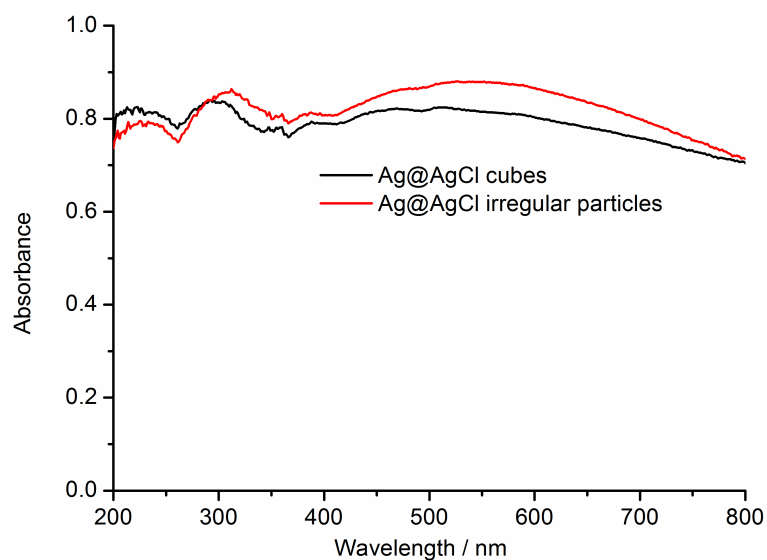

Figure S1. UV-VIS diffuse reflectance spectra of the samples: Ag@AgCl cubes (black) and Ag@AgCl irregular-shaped particles (red).

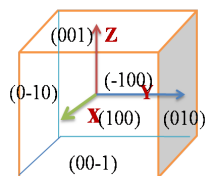

Figure S2. The crystallographic orientation of cubic AgCl crystal.

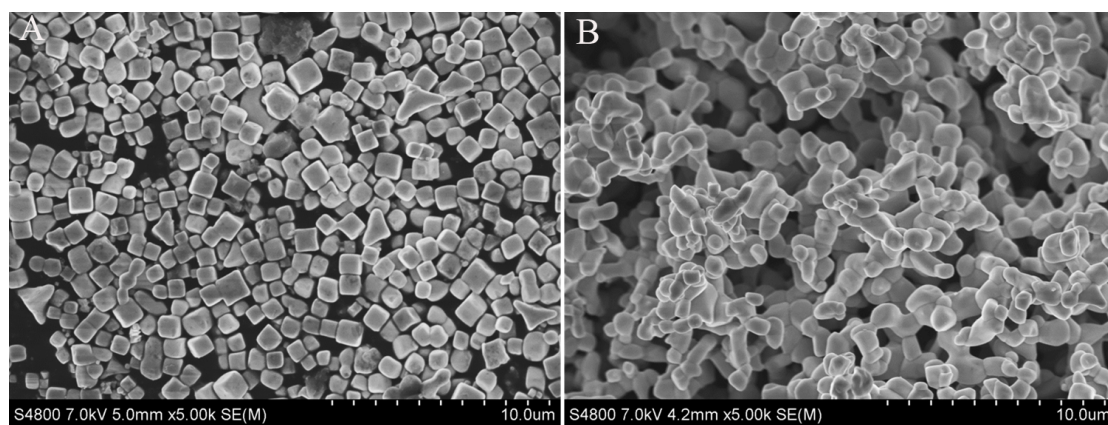

Figure S3. SEM images of Samples: AgCl cubes prepared by using electrochemical method (A); irregular-shaped AgCl prepared by traditional precipitation method (B).
